# Supplementary material
Source: publisher site journal article supplement (https://www.dovepress.com/article/582353)
Supplement: Supplementary file 1 [file Supplementary_Material%20.docx]

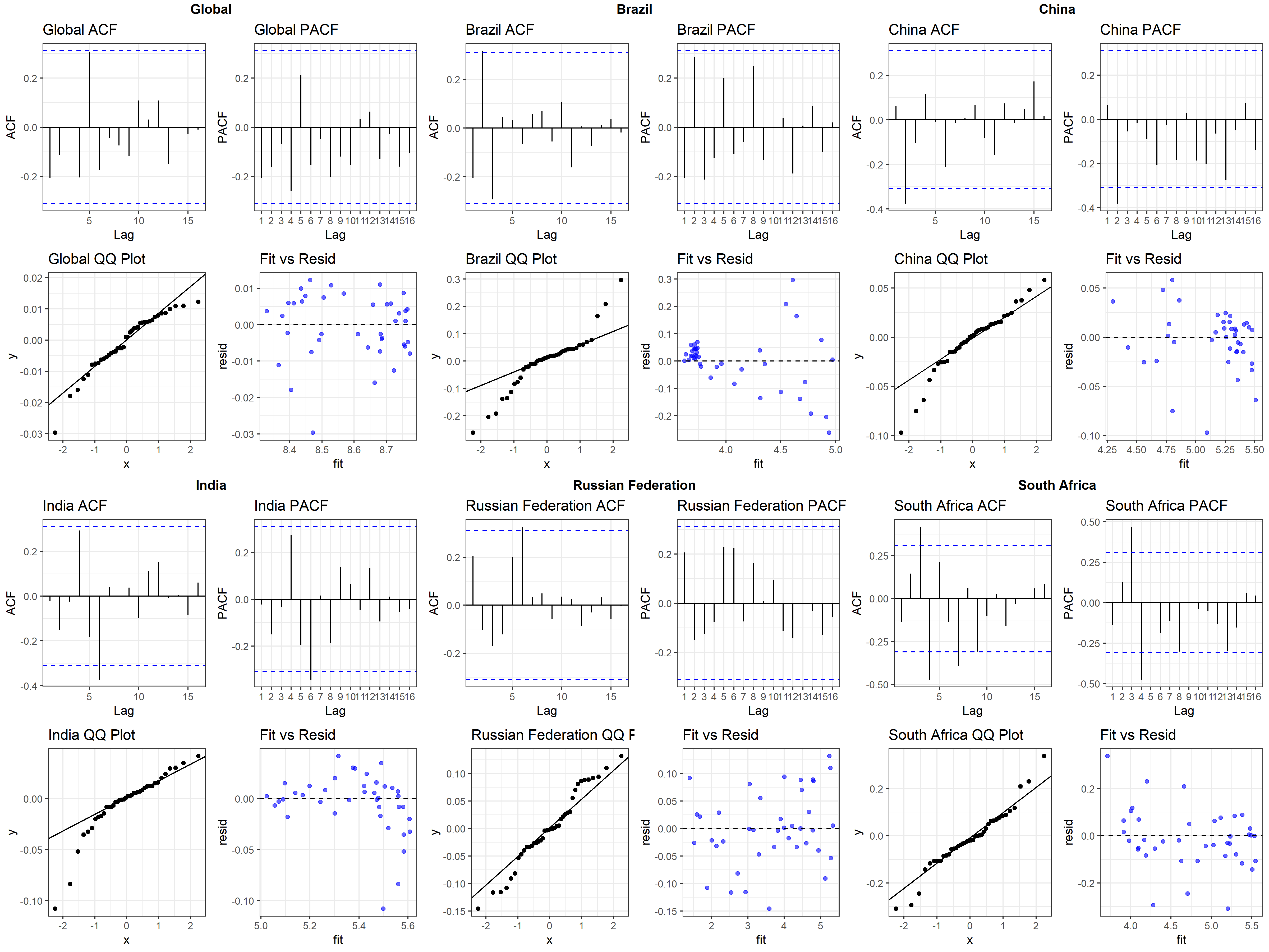


Figure S1. Model diagnostics for ARIMA models of ectopic pregnancy mortality (1982–2021)
Residual diagnostics of the final ARIMA models for the global and national time series (Global, Brazil, China, India, Russian Federation, and South Africa). For each model, the plots include: (1) the autocorrelation function (ACF) and partial autocorrelation function (PACF) of residuals used to assess serial correlation; (2) the Q–Q plot for testing normality of residuals; and (3) the residuals versus fitted values plot to evaluate homoscedasticity and independence. No substantial autocorrelation or systematic pattern was observed, indicating that the fitted ARIMA models adequately captured the temporal structure of each series.

Table S1: ARIMA model selection criteria and unit root test results.

| **Country** | **p** | **d** | **q** | **BIC** | **ADF_p** | **KPSS_p** | **LjungBox_p** |
| --- | --- | --- | --- | --- | --- | --- | --- |
| Global | 0 | 2 | 0 | -247.496 | 0.8683 | 0.01 | 0.4428 |
| Brazil | 0 | 1 | 0 | -60.028 | 0.9386 | 0.01 | 0.8205 |
| Russian Federation | 0 | 1 | 0 | -92.943 | 0.8404 | 0.01 | 0.832 |
| India | 0 | 2 | 2 | -147.904 | 0.7634 | 0.0105 | 0.5245 |
| China | 0 | 2 | 0 | -151.78 | 0.9755 | 0.01 | 0.6386 |
| South Africa | 1 | 1 | 0 | -43.047 | 0.01 | 0.0238 | 0.0025 |

Notes: p, d, q denote the orders of the autoregressive (AR), integrated (I), and moving-average (MA) components of the selected ARIMA model, respectively.
BIC = Bayesian Information Criterion; lower values indicate better model fit.
ADF p = p-value of the Augmented Dickey–Fuller unit-root test (null: series has a unit root).
KPSS p = p-value of the KPSS stationarity test (null: series is stationary).
Ljung-Box stat/p = test statistic and p-value of the Ljung-Box test on model residuals (null: no residual autocorrelation).
